# Supplementary material for: Adherence to Oral Treatments in Older Patients with Advanced Prostate Cancer, the ADHERE Study: A Prospective Trial of the Meet-URO Network
Source: PubMed Central journal article supplement — Oncologist. 2022 Aug 3;27(12):e949–56. doi: 10.1093/oncolo/oyac147 (PMC9732238; doi:10.1093/oncolo/oyac147), 2022-08-03
Supplement: oyac147_suppl_supplementary_tables.pdf [file oyac147_suppl_supplementary_tables.pdf]

**Table S1.** Adherence to abiraterone or enzalutamide in the first three months of observation

| Parameter                                     | Abiraterone<br>Cohort ( <i>n</i> = 86) | Enzalutamide<br>Cohort ( <i>n</i> = 148) | All patients<br>( <i>n</i> = 234) | P<br>value       |
|-----------------------------------------------|----------------------------------------|------------------------------------------|-----------------------------------|------------------|
|                                               | Value                                  | Value                                    | Value                             |                  |
| Assessed cycles,                              |                                        |                                          |                                   |                  |
| n (%)                                         | 253 (38)                               | 418 (62)                                 | 671                               |                  |
| Median, n. [IQR]                              | 3 [3-3]                                | 3 [3-3]                                  | 3 [3-3]                           | <b>0.014</b>     |
| Pill counting                                 |                                        |                                          |                                   |                  |
| Non-adherence <sup>a</sup> , pills n. (%)     | -805/14.084 (5.7)                      | -2.191/45.836 (4.7)                      | -3.008/59.920 (5.0)               | <b>&lt;0.001</b> |
| Non-adherence <sup>b</sup> , median % [IQR]   | 2.4 [7.7/0.0]                          | 2.4 [5.8/0.0]                            | 2.4 [6.0/0.0]                     | 0.970            |
| Compliance, dose reduction, pts, n. (%)       | 1 (1)                                  | 10 (7)                                   | 11 (5)                            | 0.0513           |
| Dose reduction, median % [IQR]                | 50 [NA]                                | 30 [25-50]                               | 25 [25-50]                        |                  |
| BAAS (patient's reporting)                    |                                        |                                          |                                   |                  |
| Patients missing, n. (%)                      | 9 (10)                                 | 28 (19)                                  | 37 (16)                           | 0.128            |
| Missing events <sup>c</sup> , n. (%)          | 13 (5.0)                               | 53 (12.8)                                | 66 (9.8)                          | <b>0.025</b>     |
| Missing reasons, n. (%)                       |                                        |                                          |                                   |                  |
| Forgot                                        | 3 (23)                                 | 21 (40)                                  | 24 (36)                           | <b>&lt;0.001</b> |
| Do not need it                                | 3 (23)                                 | 10 (19)                                  | 13 (20)                           |                  |
| Quantity                                      | 0 (0)                                  | 0 (0)                                    | 0 (0)                             |                  |
| Other                                         | 7 (54)                                 | 22 (42)                                  | 29 (44)                           |                  |
| Clinical diary                                |                                        |                                          |                                   |                  |
| Non-adherence <sup>d</sup> , patients n. (%)  | 7 (13)                                 | 17 (16)                                  | 24 (15)                           | 0.5903           |
| Non-compliance <sup>e</sup> , patients n. (%) | 32 (37)                                | 43 (29)                                  | 75 (32)                           | 0.1975           |

<sup>a</sup>Based on the proportion of missed/prescribed pills ratio

<sup>b</sup>Proportions based on missed/prescribed pills ratio, reported as the median (and IQR) of individual proportions over the treatment period

<sup>c</sup>Proportions based on reported missing events/total number of cycles ratio

<sup>d</sup>Proportions based on fulfilled/delivered diary ratio in patients completing at least one diary.

<sup>e</sup>Patients not completing any of the diaries delivered.

Abbreviations: IQR, interquartile range; m, months; n, number; NA, not assessable.

**Table 2S. Logistic regression analysis of baseline factors<sup>a</sup> related to non-adherence<sup>b</sup> to abiraterone or enzalutamide in the whole period of observation**

| <b>Variable</b>                  | <b>OR (95% CI)</b> | <b>P value</b>   |
|----------------------------------|--------------------|------------------|
| Treatment (Abi vs Enza)          | 1.58 (0.88-2.84)   | 0.123            |
| Geriatric G8 score (<13 cut-off) | 0.33 (0.18-0.61)   | <b>&lt;0.001</b> |
| IADL (<6.5 cut-off)              | 1.29 (0.72-2.30)   | 0.395            |
| Concomitant drugs (<3 cut off)   | 0.43 (0.24-0.76)   | <b>0.004</b>     |
| Caregiver presence (no vs yes)   | 0.36 (0.17-0.75)   | <b>0.006</b>     |

Abbreviations: Abi, Abiraterone; Enza, enzalutamide; IADL, instrumental activity daily living; OR, odds ratio; ROC, receiver operating characteristic curves.

<sup>a</sup>With cut-offs assessed by the ROC curves reported in Figure 1 for the Geriatric G8, IADL and number of concomitant drugs.

<sup>b</sup>Defined by the median of individual non-adherence proportions as the cut-off of  $\geq 2.4\%$ .

In bold statistically significant values-
